# Supplementary figures and images for: Dominant spinal muscular atrophy linked mutations in the cargo binding domain of BICD2 result in altered interactomes and dynein hyperactivity
Source: eLife journal article supplement (doi:10.7554/elife.107503), 2025-06-26

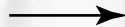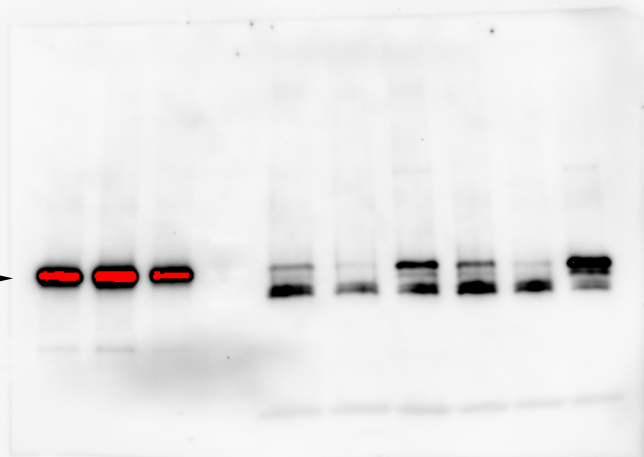

Supplement: fig1-figsupp1-data2 [file Fig1-figure supplement GFP western long exposure copy.pdf › Fig1-figure supplement GFP western long exposure copy.pdf]

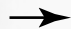

Total

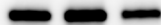

Binding

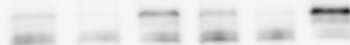

Supplement: fig1-figsupp1-data2 [file Fig1-figure supplement GFP western short exposure.pdf › Fig1-figure supplement GFP western short exposure.pdf]

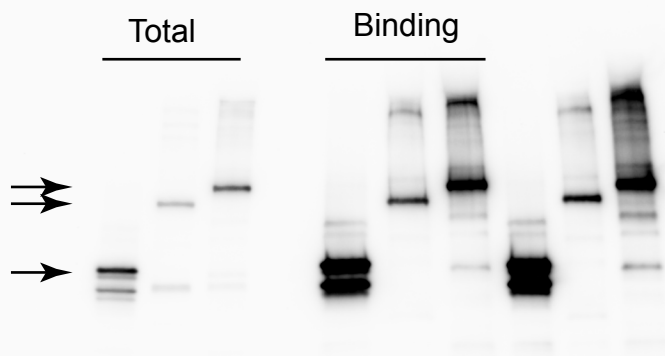

Supplement: fig1-figsupp1-data2 [file Fig1-figure supplement V5.pdf › Fig1-figure supplement V5.pdf]

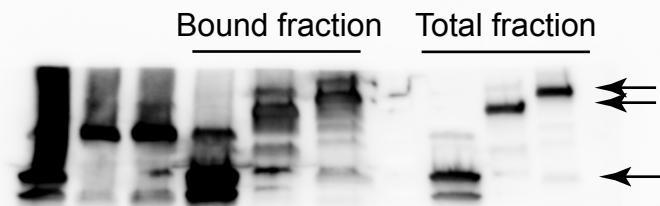

Supplement: fig2-data2 [file Fig2A V5.pdf › Fig2A V5.pdf]

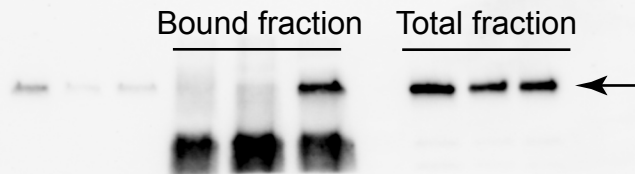

Supplement: fig2-data2 [file Fig2A VPS41.pdf › Fig2A VPS41.pdf]

Total

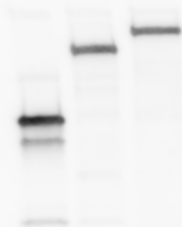

Binding

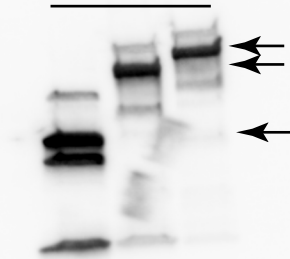

Supplement: fig2-data2 [file Fig2B V5 blot.pdf › Fig2B V5 blot.pdf]

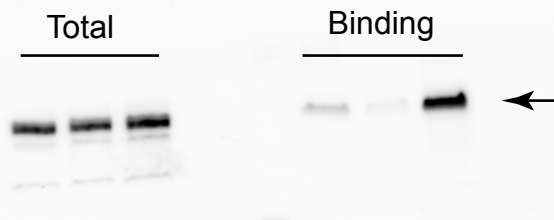

Supplement: fig2-data2 [file Fig2B Vps16.pdf › Fig2B Vps16.pdf]

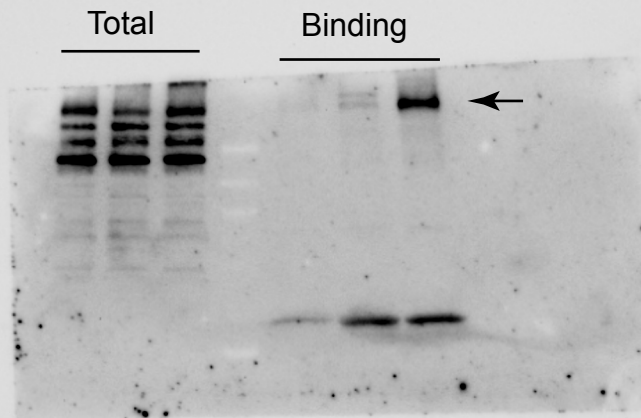

Supplement: fig2-data2 [file Fig2B Vps18.pdf › Fig2B Vps18.pdf]

This lane was not used in the figure

Total fraction

Bound fraction

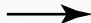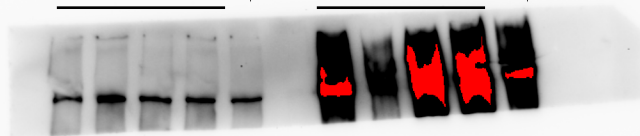

Supplement: fig2-data2 [file Fig2D RanBP2 long exposure.pdf › Fig2D RanBP2 long exposure.pdf]

This lane was not used in the figure

Total fraciton

Bound fraciton

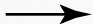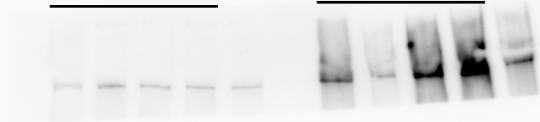

Supplement: fig2-data2 [file Fig2D RanBP2 short exposure.pdf › Fig2D RanBP2 short exposure.pdf]

This lane was not used in the figure

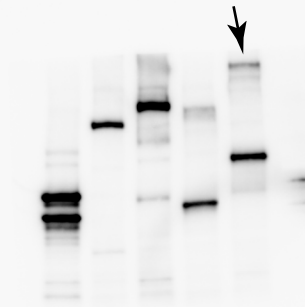

Supplement: fig2-data2 [file Fig2D V5 blot.pdf › Fig2D V5 blot.pdf]

This lane was not used in the figure

Total fraction

Bound fraction

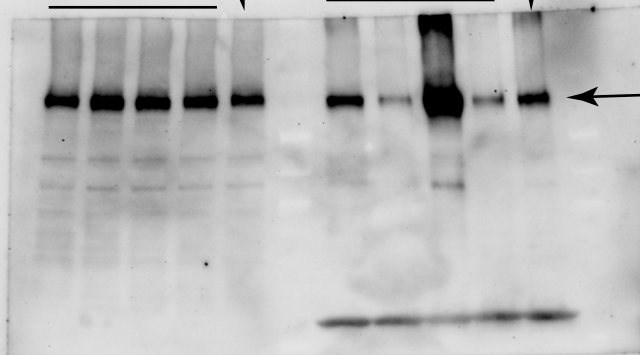

Supplement: fig2-data2 [file Fig2D Vps41 long exposure.pdf › Fig2D Vps41 long exposure.pdf]

This lane was not used in the figure

Total fraction

Bound fraction

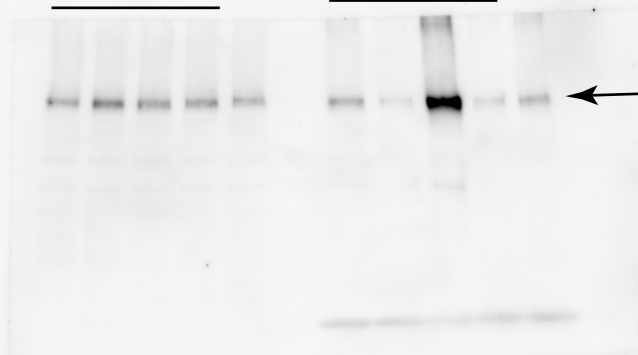

Supplement: fig2-data2 [file Fig2D Vps41 short exposure.pdf › Fig2D Vps41 short exposure.pdf]

Total Binding

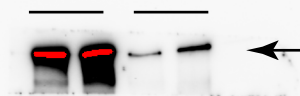

Supplement: fig2-figsupp1-data2 [file Figure2-figure supplement 2A RanBP2 long exposure.pdf › Figure2-figure supplement 2A RanBP2 long exposure.pdf]

Total Binding

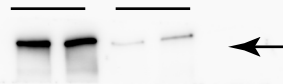

Supplement: fig2-figsupp1-data2 [file Figure2-figure supplement 2A RanBP2 short exposure.pdf › Figure2-figure supplement 2A RanBP2 short exposure.pdf]

Total   Binding

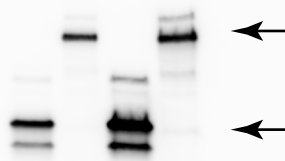

Supplement: fig2-figsupp1-data2 [file Figure2-figure supplement 2A V5.pdf › Figure2-figure supplement 2A V5.pdf]

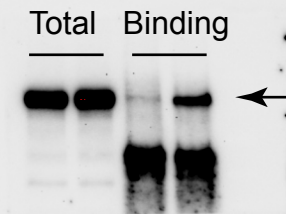

Supplement: fig2-figsupp1-data2 [file Figure2-figure supplement 2A Vps41 long exposure.pdf › Figure2-figure supplement 2A Vps41 long exposure.pdf]

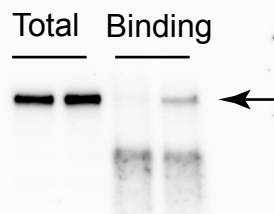

Supplement: fig2-figsupp1-data2 [file Figure2-figure supplement 2A Vps41 short exposurepdf.pdf › Figure2-figure supplement 2A Vps41 short exposurepdf.pdf]

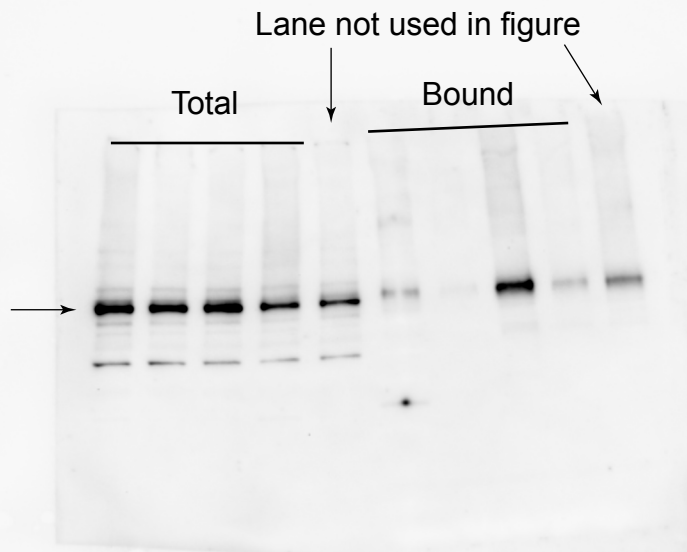

Supplement: fig2-figsupp1-data2 [file Figure2-figure supplement 2B Vps16.pdf › Figure2-figure supplement 2B Vps16.pdf]

Lane not used in figure

Total

Bound

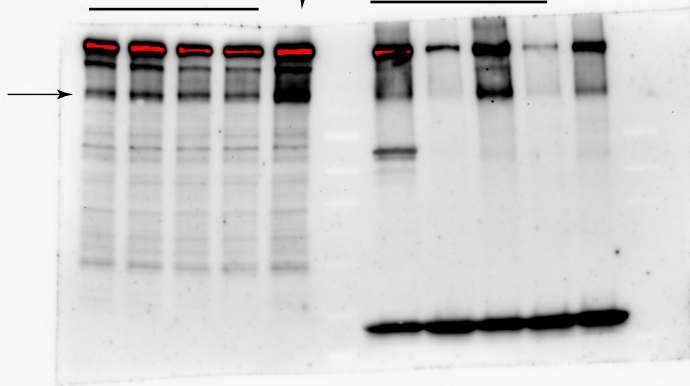

Supplement: fig2-figsupp1-data2 [file Figure2-figure supplement 2B Vps18.pdf › Figure2-figure supplement 2B Vps18.pdf]

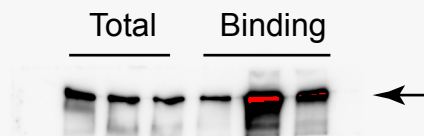

Supplement: fig2-figsupp1-data2 [file Figure2-figure supplement 2C RanBP2 long exposure.pdf › Figure2-figure supplement 2C RanBP2 long exposure.pdf]

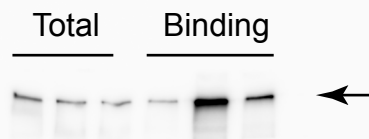

Supplement: fig2-figsupp1-data2 [file Figure2-figure supplement 2C RanBP2 short exposure.pdf › Figure2-figure supplement 2C RanBP2 short exposure.pdf]

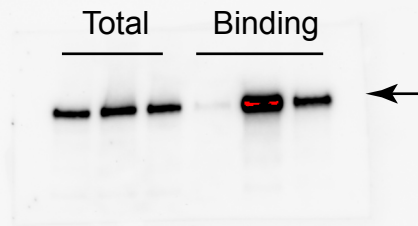

Supplement: fig2-figsupp1-data2 [file Figure2-figure supplement 2C Vps41 long exposure.pdf › Figure2-figure supplement 2C Vps41 long exposure.pdf]

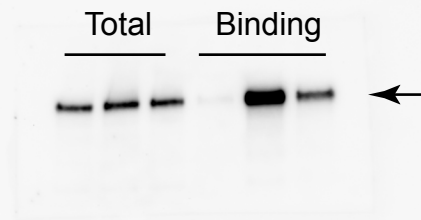

Supplement: fig2-figsupp1-data2 [file Figure2-figure supplement 2C Vps41 short exposure.pdf › Figure2-figure supplement 2C Vps41 short exposure.pdf]

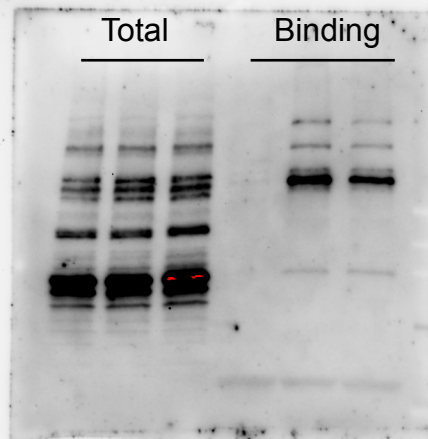

Supplement: fig2-figsupp1-data2 [file Figure2-figure supplement 2D Vps16.pdf › Figure2-figure supplement 2D Vps16.pdf]

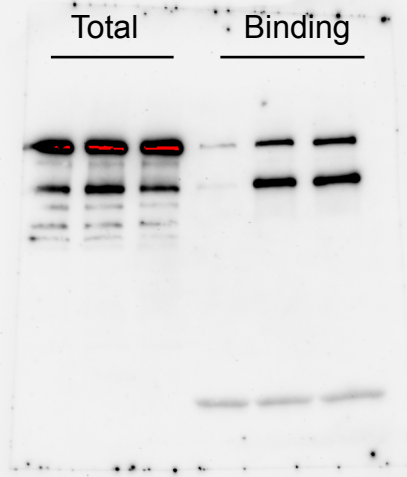

Supplement: fig2-figsupp1-data2 [file Figure2-figure supplement 2D Vps18 long exposure.pdf › Figure2-figure supplement 2D Vps18 long exposure.pdf]

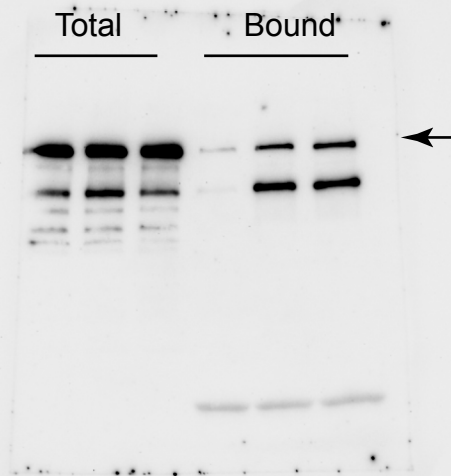

Supplement: fig2-figsupp1-data2 [file Figure2-figure supplement 2D Vps18 short exposure.pdf › Figure2-figure supplement 2D Vps18 short exposure.pdf]

Total

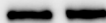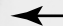

Supplement: fig2-figsupp1-data2 [file Figure2-figure supplement 2D Vps41.pdf › Figure2-figure supplement 2D Vps41.pdf]

lanes used in figure

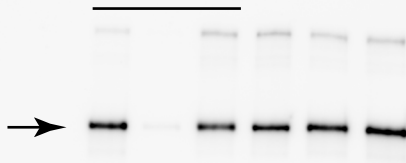

Supplement: fig3-figsupp1-data2 [file Figure3-figure supplement 3A BicD2.pdf › Figure3-figure supplement 3A BicD2.pdf]

lanes used in figure

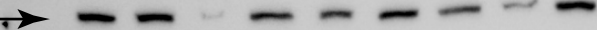

Supplement: fig3-figsupp1-data2 [file Figure3-figure supplement 3A Dhc.pdf › Figure3-figure supplement 3A Dhc.pdf]

lanes used in figure

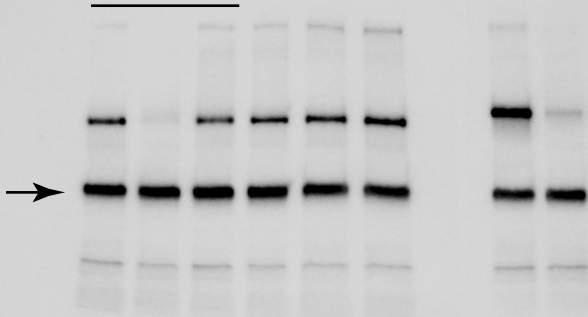

Supplement: fig3-figsupp1-data2 [file Figure3-figure supplement 3A Tubulin.pdf › Figure3-figure supplement 3A Tubulin.pdf]

Lanes used in blot

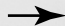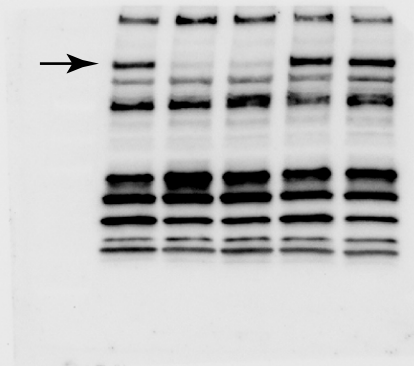

Supplement: fig3-figsupp1-data2 [file Figure3-figure supplement 3B BicD2.pdf › Figure3-figure supplement 3B BicD2.pdf]

Lanes used in blot

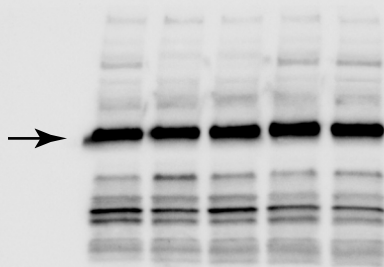

Supplement: fig3-figsupp1-data2 [file Figure3-figure supplement 3B Tubulin.pdf › Figure3-figure supplement 3B Tubulin.pdf]

Lanes used in figure

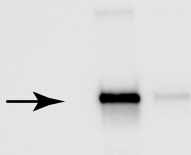

Supplement: fig3-figsupp1-data2 [file Figure3-figure supplement 3C KIF5B.pdf › Figure3-figure supplement 3C KIF5B.pdf]

Lanes used in figure

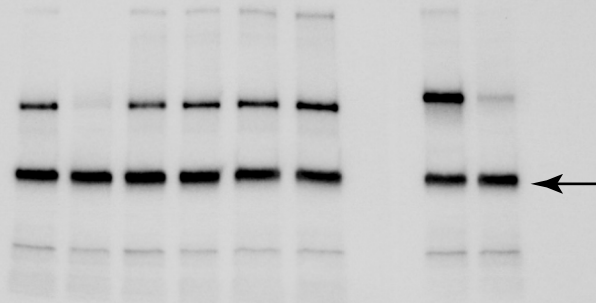

Supplement: fig3-figsupp1-data2 [file Figure3-figure supplement 3C Tubulin.pdf › Figure3-figure supplement 3C Tubulin.pdf]

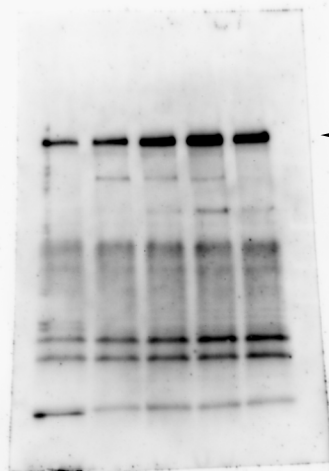

Supplement: fig4-data2 [file Fig4A bound fraction DCTN1.pdf › Fig4A bound fraction DCTN1.pdf]

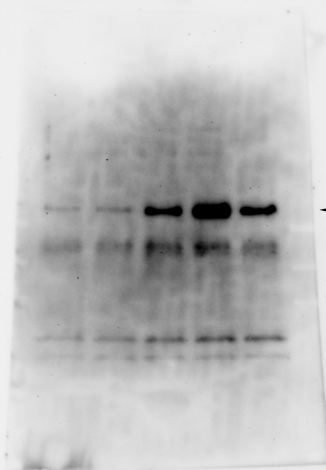

Supplement: fig4-data2 [file Fig4A bound fraction DIC.pdf › Fig4A bound fraction DIC.pdf]

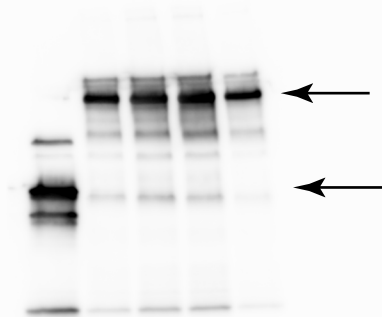

Supplement: fig4-data2 [file Fig4A bound fraction V5.pdf › Fig4A bound fraction V5.pdf]

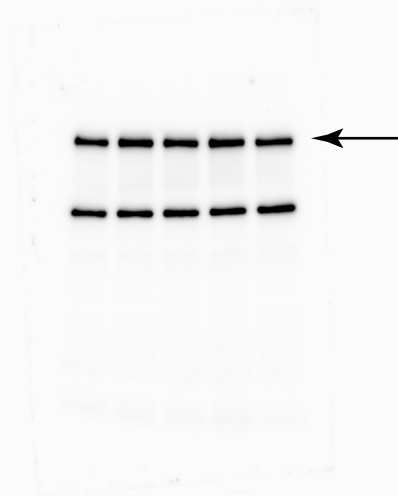

Supplement: fig4-data2 [file Fig4A total fraction DCTN1.pdf › Fig4A total fraction DCTN1.pdf]

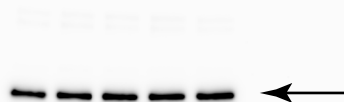

Supplement: fig4-data2 [file Fig4A total fraction DIC.pdf › Fig4A total fraction DIC.pdf]

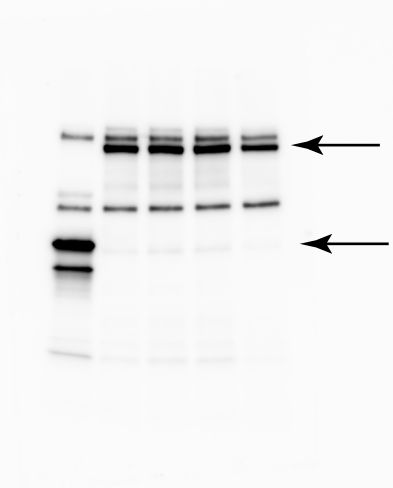

Supplement: fig4-data2 [file Fig4A total fraction V5.pdf › Fig4A total fraction V5.pdf]

Total

Bound

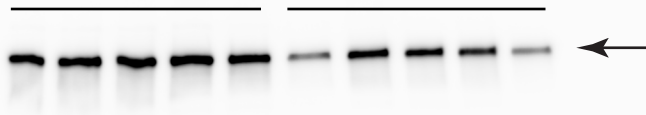

Supplement: fig4-figsupp1-data2 [file Figure4-figure supplement 4H KIF5B.pdf › Figure4-figure supplement 4H KIF5B.pdf]

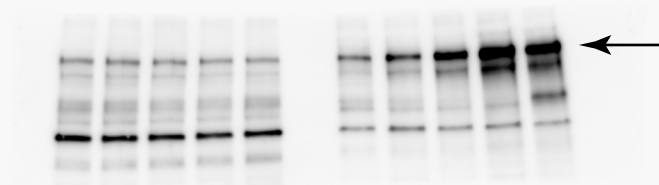

Supplement: fig6-data2 [file Fig6D CSPP1.pdf › Fig6D CSPP1.pdf]

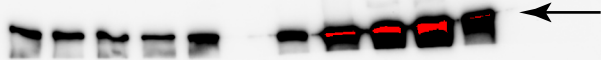

Supplement: fig6-data2 [file Fig6D RanBP2 long exposure.pdf › Fig6D RanBP2 long exposure.pdf]

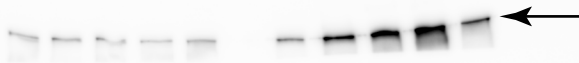

Supplement: fig6-data2 [file Fig6D RanBP2 short exposure.pdf › Fig6D RanBP2 short exposure.pdf]

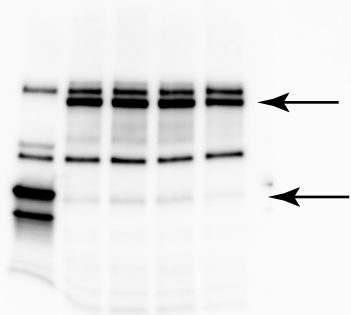

Supplement: fig6-data2 [file Fig6D V5.pdf › Fig6D V5.pdf]

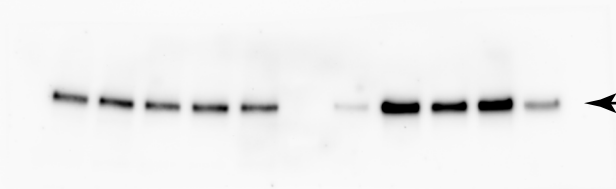

Supplement: fig6-data2 [file Fig6D Vps41 long exposure.pdf › Fig6D Vps41 long exposure.pdf]

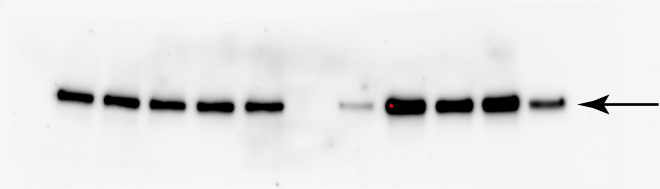

Supplement: fig6-data2 [file Fig6D Vps41 short exposure.pdf › Fig6D Vps41 short exposure.pdf]

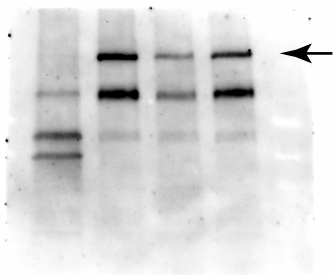

Supplement: fig6-figsupp1-data2 [file Figure6-figure supplement 6A Importin beta bound fraction.pdf › Figure6-figure supplement 6A Importin beta bound fraction.pdf]

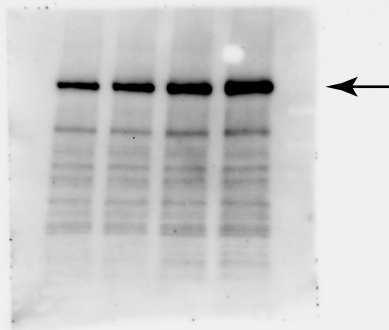

Supplement: fig6-figsupp1-data2 [file Figure6-figure supplement 6A Importin beta total fraction.pdf › Figure6-figure supplement 6A Importin beta total fraction.pdf]

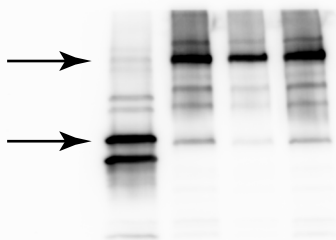

Supplement: fig6-figsupp1-data2 [file Figure6-figure supplement 6A V5 bound fraction.pdf › Figure6-figure supplement 6A V5 bound fraction.pdf]

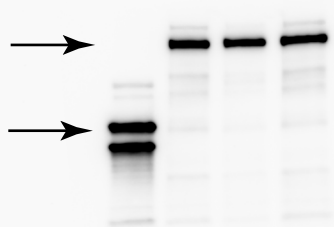

Supplement: fig6-figsupp1-data2 [file Figure6-figure supplement 6A V5 total fraction.pdf › Figure6-figure supplement 6A V5 total fraction.pdf]

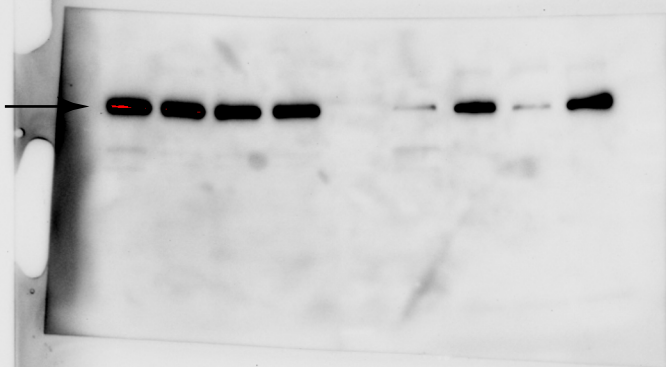

Supplement: fig6-figsupp1-data2 [file Figure6-figure supplement 6B Importin beta long exposure.pdf › Figure6-figure supplement 6B Importin beta long exposure.pdf]

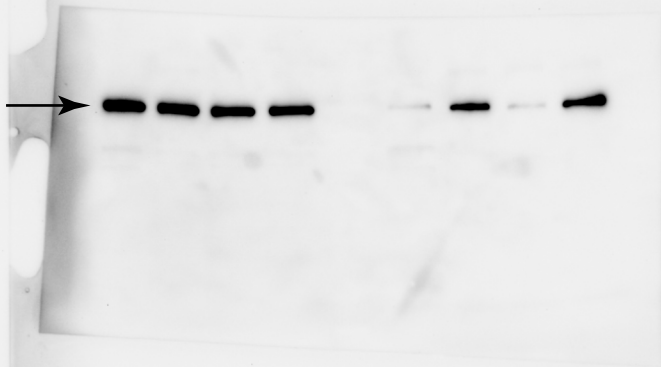

Supplement: fig6-figsupp1-data2 [file Figure6-figure supplement 6B Importin beta short exposure.pdf › Figure6-figure supplement 6B Importin beta short exposure.pdf]

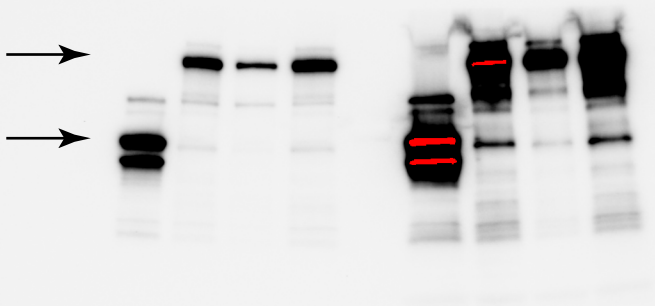

Supplement: fig6-figsupp1-data2 [file Figure6-figure supplement 6B V5 long exposure.pdf › Figure6-figure supplement 6B V5 long exposure.pdf]

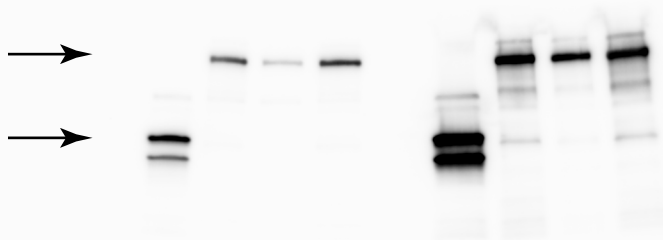

Supplement: fig6-figsupp1-data2 [file Figure6-figure supplement 6B V5 short exposure.pdf › Figure6-figure supplement 6B V5 short exposure.pdf]

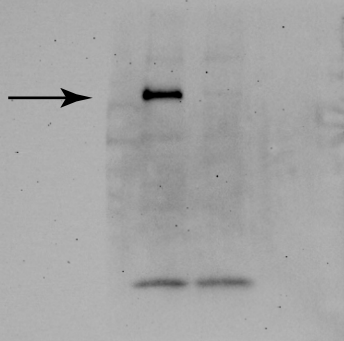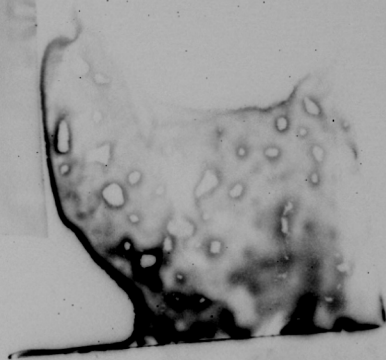

Supplement: fig6-figsupp1-data2 [file Figure6-figure supplement 6C Importin beta bound fraction.pdf › Figure6-figure supplement 6C Importin beta bound fraction.pdf]

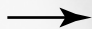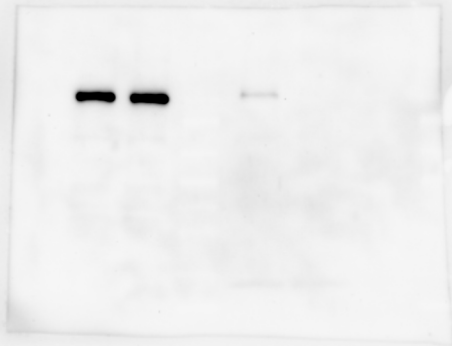

Supplement: fig6-figsupp1-data2 [file Figure6-figure supplement 6C Importin beta total fraction.pdf › Figure6-figure supplement 6C Importin beta total fraction.pdf]

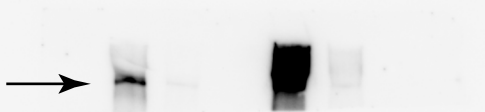

Supplement: fig6-figsupp1-data2 [file Figure6-figure supplement 6C RanBP2 long exposure.pdf › Figure6-figure supplement 6C RanBP2 long exposure.pdf]

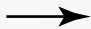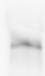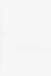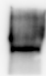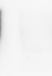

Supplement: fig6-figsupp1-data2 [file Figure6-figure supplement 6C RanBP2 short exposure.pdf › Figure6-figure supplement 6C RanBP2 short exposure.pdf]

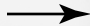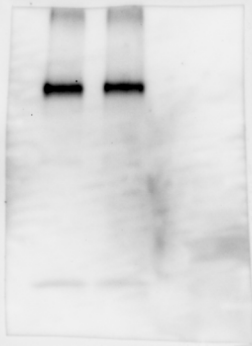

Supplement: fig6-figsupp1-data2 [file Figure6-figure supplement 6C Vps41 bound fraction.pdf › Figure6-figure supplement 6C Vps41 bound fraction.pdf]

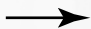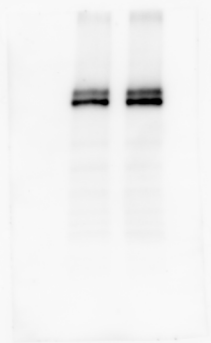

Supplement: fig6-figsupp1-data2 [file Figure6-figure supplement 6C Vps41 total fraction.pdf › Figure6-figure supplement 6C Vps41 total fraction.pdf]

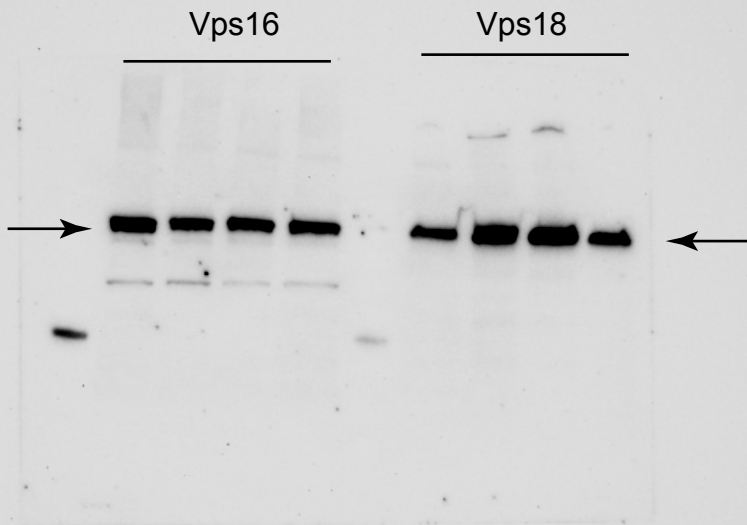

Supplement: fig6-figsupp1-data2 [file Figure6-figure supplement 6D Vps16 and Vps18 total fraction.pdf › Figure6-figure supplement 6D Vps16 and Vps18 total fraction.pdf]

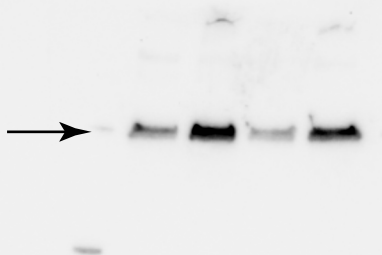

Supplement: fig6-figsupp1-data2 [file Figure6-figure supplement 6D Vps16 bound fraction.pdf › Figure6-figure supplement 6D Vps16 bound fraction.pdf]

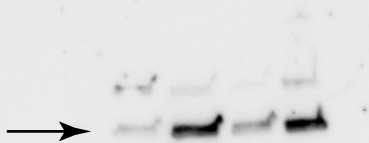

Supplement: fig6-figsupp1-data2 [file Figure6-figure supplement 6D Vps18 bound fraction.pdf › Figure6-figure supplement 6D Vps18 bound fraction.pdf]

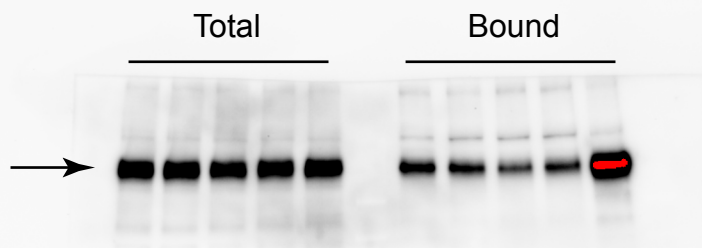

Supplement: fig7-data2 [file Fig7A GRAMD1A long exposure.pdf › Fig7A GRAMD1A long exposure.pdf]

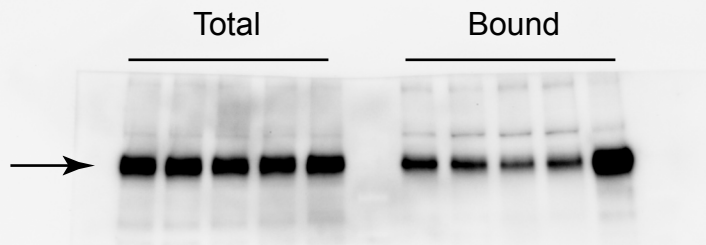

Supplement: fig7-data2 [file Fig7A GRAMD1A short exposure.pdf › Fig7A GRAMD1A short exposure.pdf]

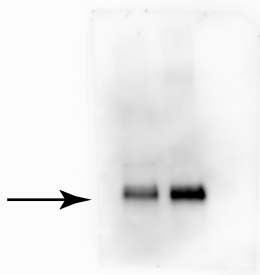

Supplement: fig7-figsupp1-data2 [file Figure7-figure supplement 7A GRAMD1A bound fraction.pdf › Figure7-figure supplement 7A GRAMD1A bound fraction.pdf]

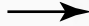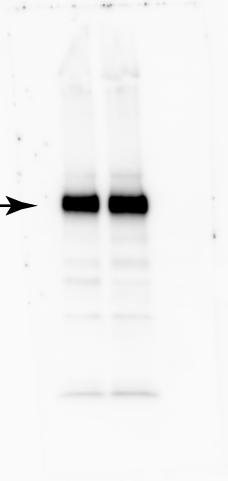

Supplement: fig7-figsupp1-data2 [file Figure7-figure supplement 7A GRAMD1A total fraction.pdf › Figure7-figure supplement 7A GRAMD1A total fraction.pdf]

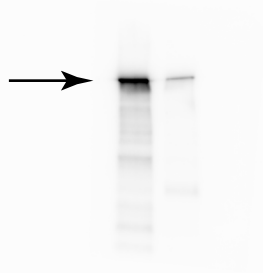

Supplement: fig7-figsupp1-data2 [file Figure7-figure supplement 7A RANBP2 bound fraction.pdf › Figure7-figure supplement 7A RANBP2 bound fraction.pdf]

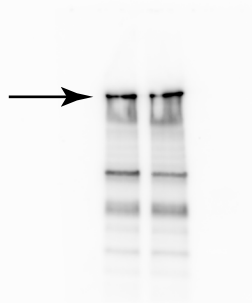

Supplement: fig7-figsupp1-data2 [file Figure7-figure supplement 7A RANBP2 total fraction.pdf › Figure7-figure supplement 7A RANBP2 total fraction.pdf]
